# Supplementary material for: Endocytosis of Multiwalled Carbon Nanotubes in Bronchial Epithelial and Mesothelial Cells
Source: Biomed Res Int. 2015 May 18;2015:793186. doi: 10.1155/2015/793186 (PMC4450259; doi:10.1155/2015/793186)
Supplement: Supplementary file 1 — Movie S1: Time-lapse imaging of HBECs that were exposed to 10 μg/mL MWNT-7 in 0.1% gelatin at 10 min for 24 h using fluorescence microscopy. Lysosomes were prestained red with CytoPainter. Movie S2: Time-lapse imaging of HMCs which were exposed to 10 μg/mL MWNT-7 in 0.1% gelatin at 10 min for 24 h using fluorescence microscopy. Lysosome were prestained red with CytoPainter. [file 793186.f1.zip]

Archive with 4 entries (2 files):
- mat.793186.v2/
- mat.793186.v2/Movies for Endo/
- mat.793186.v2/Movies for Endo/Movie S1 for Endo.3gp
- mat.793186.v2/Movies for Endo/Movie S2 for Endo.3gp
